# Supplementary material for: Assessing the parameters modulating optical losses of iron oxide nanoparticles under near infrared irradiation
Source: Royal Society of Chemistry journal article supplement (doi:10.1039/d1na00601k), 2021-01-01
Supplement: d1na00601k1.pdf [file d1na00601k1.pdf]

## ELECTRONIC SUPPORTING INFORMATION

# Assessing the parameters modulating optical losses of iron oxide nanoparticles under near infrared irradiation

Claudia Lozano-Pedraza,<sup>1</sup> Elena Plaza-Mayoral,<sup>1</sup> Ana Espinosa,<sup>1,2</sup> Begoña Sot,<sup>1,2</sup> Aida Serrano,<sup>3</sup> Gorka Salas,<sup>1,2</sup> Cristina Blanco-Andujar,<sup>4</sup> Geoffrey Cotin,<sup>4</sup> Delphine Felder-Flesch,<sup>4</sup> Sylvie Begin-Colin<sup>4</sup> and Francisco J. Teran<sup>1,2</sup>

<sup>1</sup>*iMdea Nanociencia, Campus Universitaria de Cantoblanco, 28049 Madrid, Spain.*

<sup>2</sup>*Nanobiotecnología (iMdea-Nanociencia), Unidad Asociada al Centro Nacional de Biotecnología (CSIC), 28049 Madrid, Spain.*

<sup>3</sup>*Dpto. Electrocerámica, Instituto de Cerámica y Vidrio, ICV-CSIC, Kelsen 5, 28049 Madrid, Spain.*

<sup>4</sup>*Université de Strasbourg, CNRS, Institut de Physique et Chimie des Matériaux de Strasbourg, UMR 7504, F-67000 Strasbourg, France.*

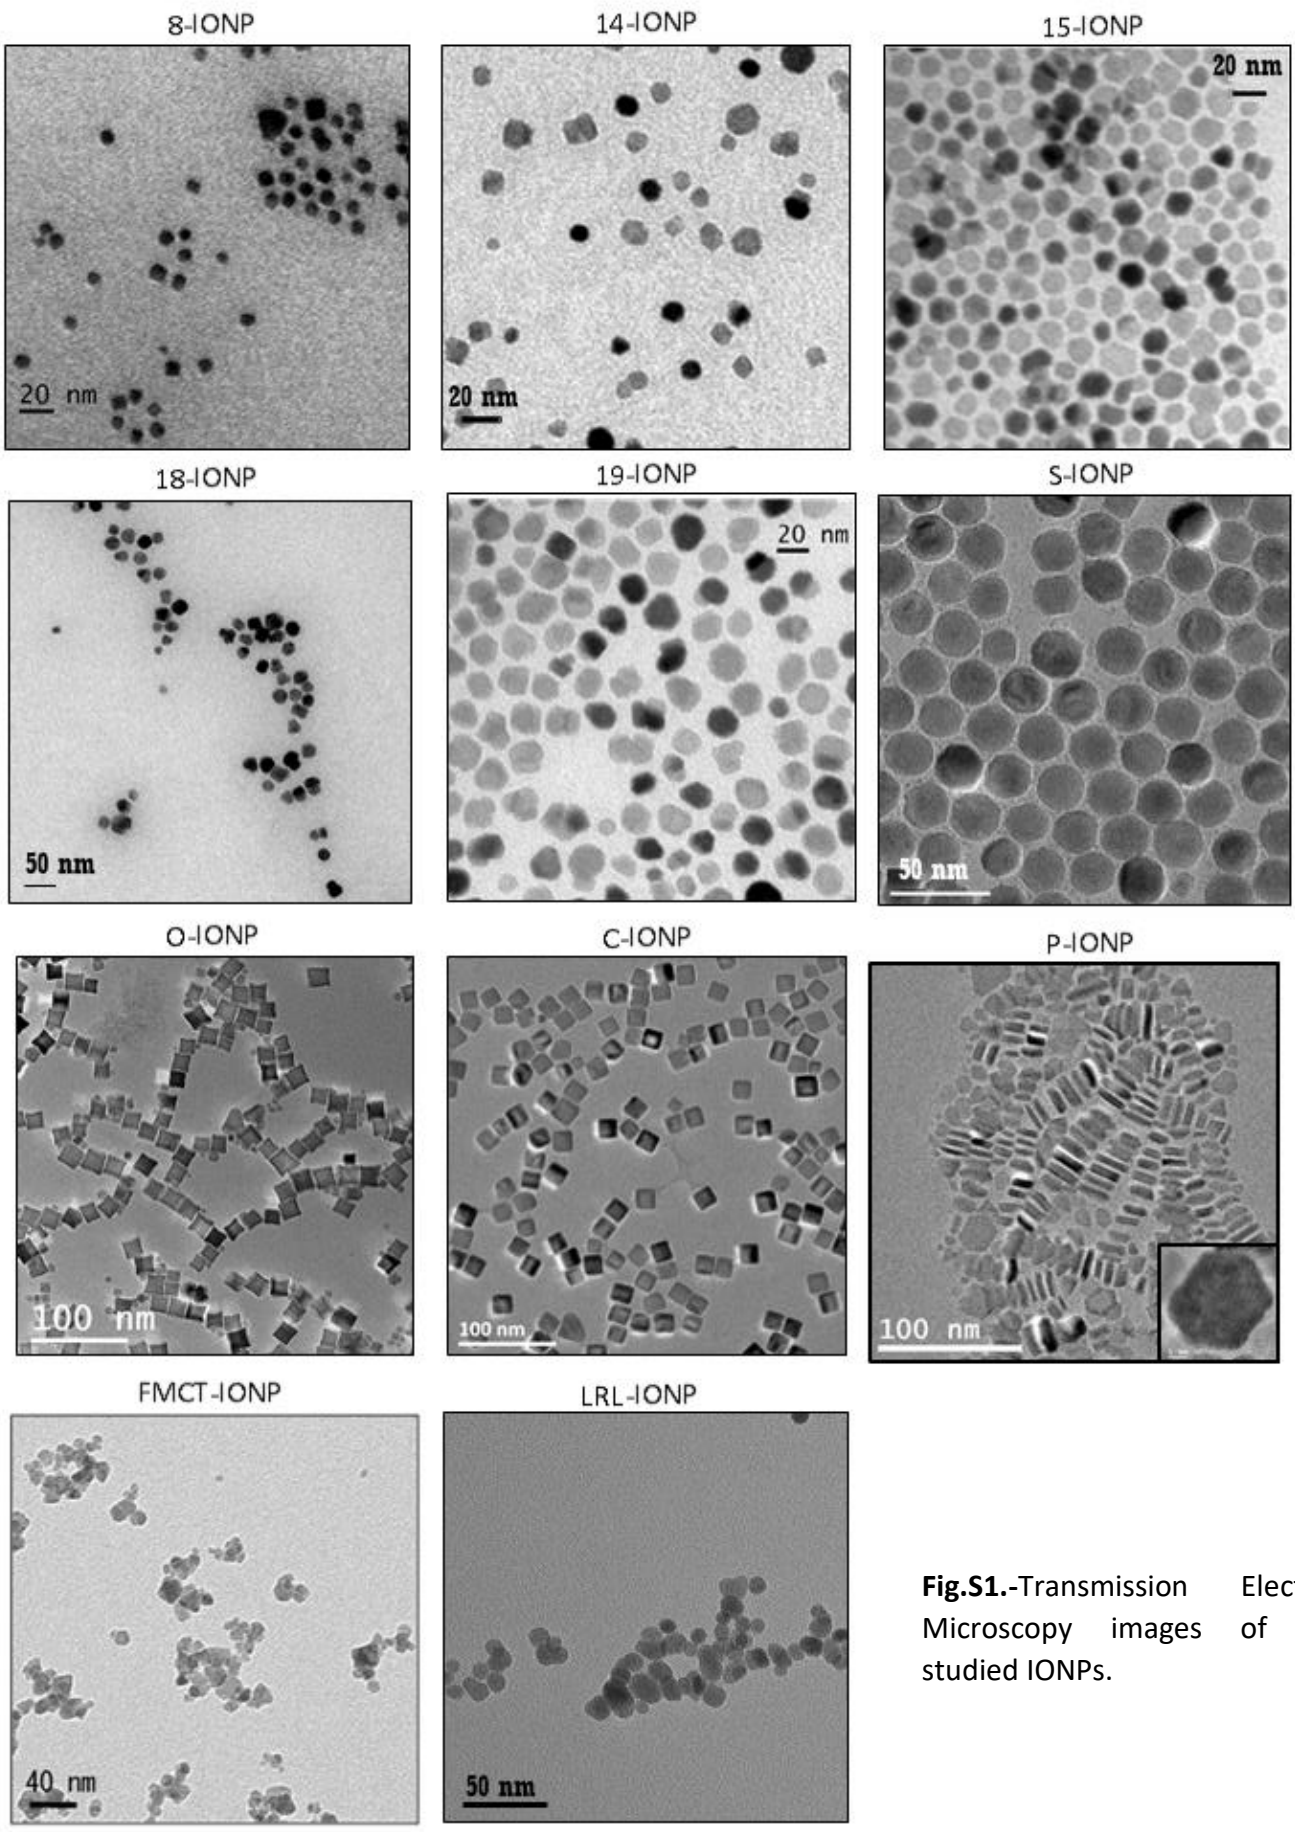

**Fig.S1.**-Transmission Electron Microscopy images of the studied IONPs.

**Table S1.-** Summary of magnetic parameters from the studied IONPs at RT. L=length; W= width.

| Name    | $M_s$<br>( $\text{Am}^2/\text{kg}_{\text{Fe}}$ ) | $H_c$<br>(kA/m) |
|---------|--------------------------------------------------|-----------------|
| 8-IONP  | 92                                               | < 1             |
| 14-IONP | 106                                              | < 1             |
| 15-IONP | 107                                              | < 1             |
| 18-IONP | 55                                               | < 1             |
| 19-IONP | 104                                              | < 1             |
| FM-CT   | 120                                              | 1.2             |
| LRL     | 73                                               | 3.2             |
| P-IONP  | 44                                               | < 1             |
| S-IONP  | 89                                               | < 1             |
| C-IONP  | 139                                              | $\approx 1$     |
| O-IONP  | 149                                              | < 1             |

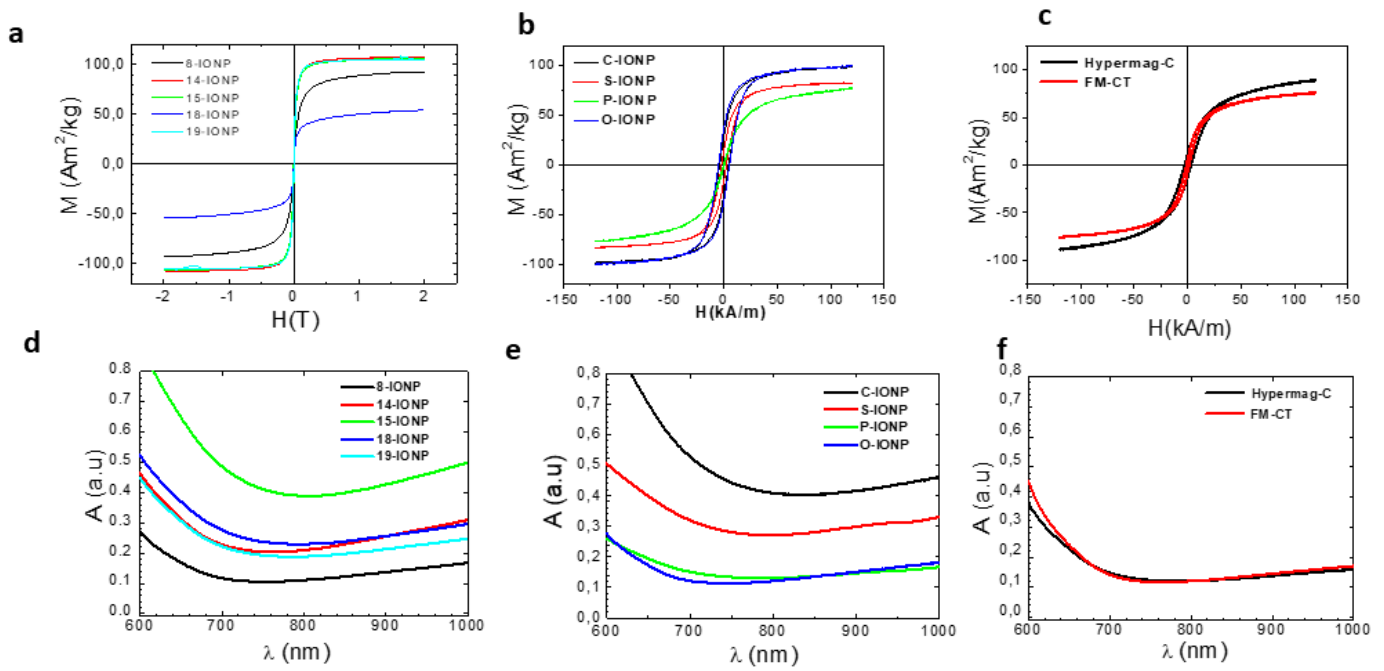

**Fig. S2.-** (a,b,c) Mass-normalized magnetization cycles under quasi-static conditions at RT; (d,e,f) Optical absorption spectra in the NIR range at RT. The studied IONPs were dispersed in DDW at  $[\text{Fe}] = 1 \text{ g/L}$ .

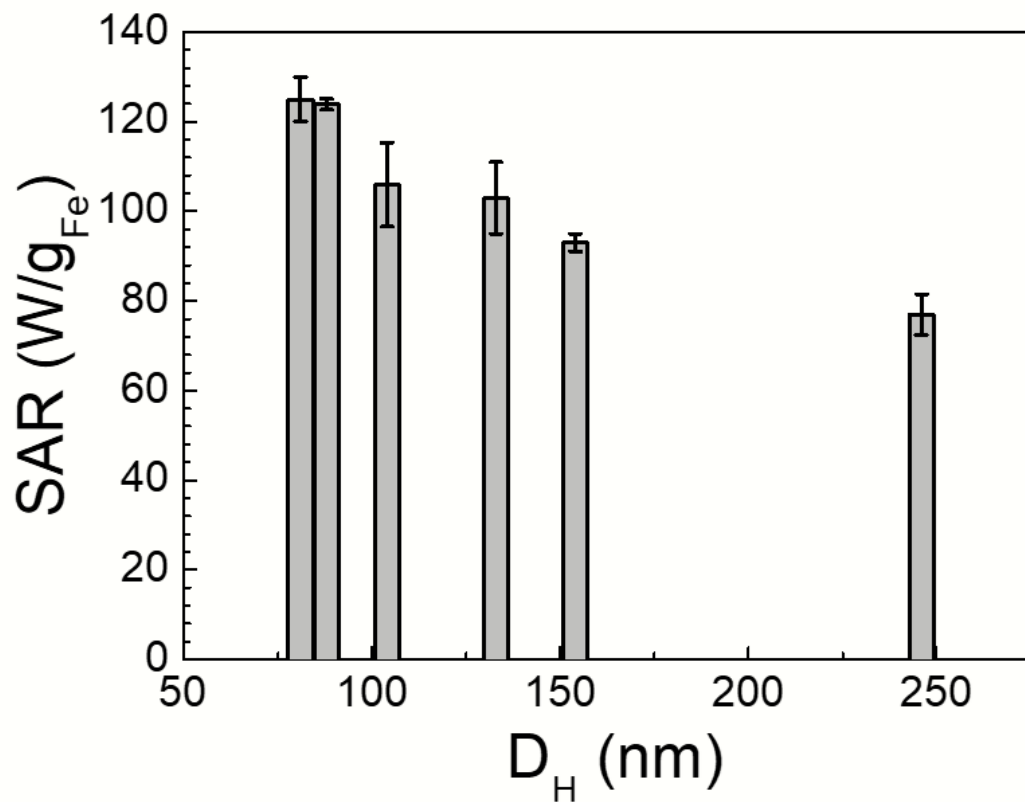

**Fig. S3.-** Magnetic SAR values of LRL IONPs at different D<sub>H</sub>. H<sub>AC</sub> conditions: 100 kHz, 32 kA/m. Iron content in DDW suspension [Fe]=1g/L.

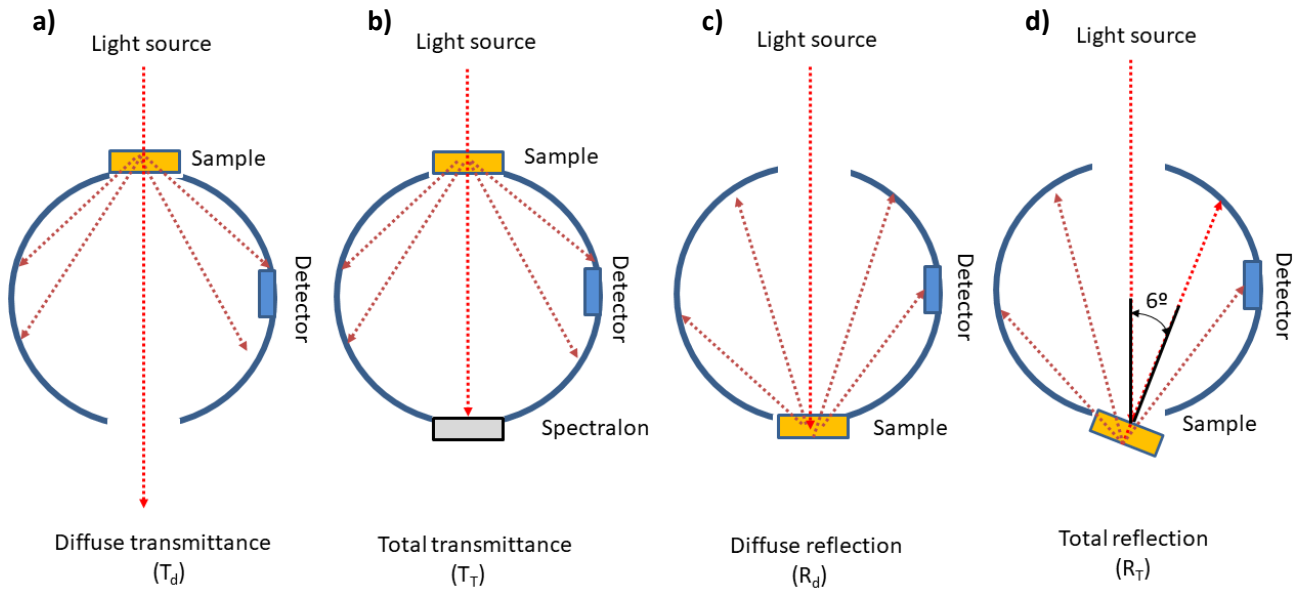

**Fig.S4.-** Different configurations of the integrating sphere spectrometer for distinct transmission and reflectance measurements: (a) Diffuse transmittance ( $T_d$ ): the direct transmittance ( $T_D$ ) escapes the sphere through the open exit port (without spectralon) on the opposite side of the entrance port; (b) Total transmittance ( $T_T$ ): both direct ( $T_D$ ) and diffuse ( $T_d$ ) components of transmittance are collected inside the integrating sphere by blocking the exit port with the spectralon; (c) Diffuse reflection ( $R_d$ ): direct reflection ( $R_D$ ) escapes the integrating sphere through the entrance port while diffuse reflection is collected inside the sphere; (d) Total reflection ( $R_T$ ): sample holder is rotated  $6^\circ$  in order to collect both direct ( $R_D$ ) and diffuse ( $R_d$ ) reflection.

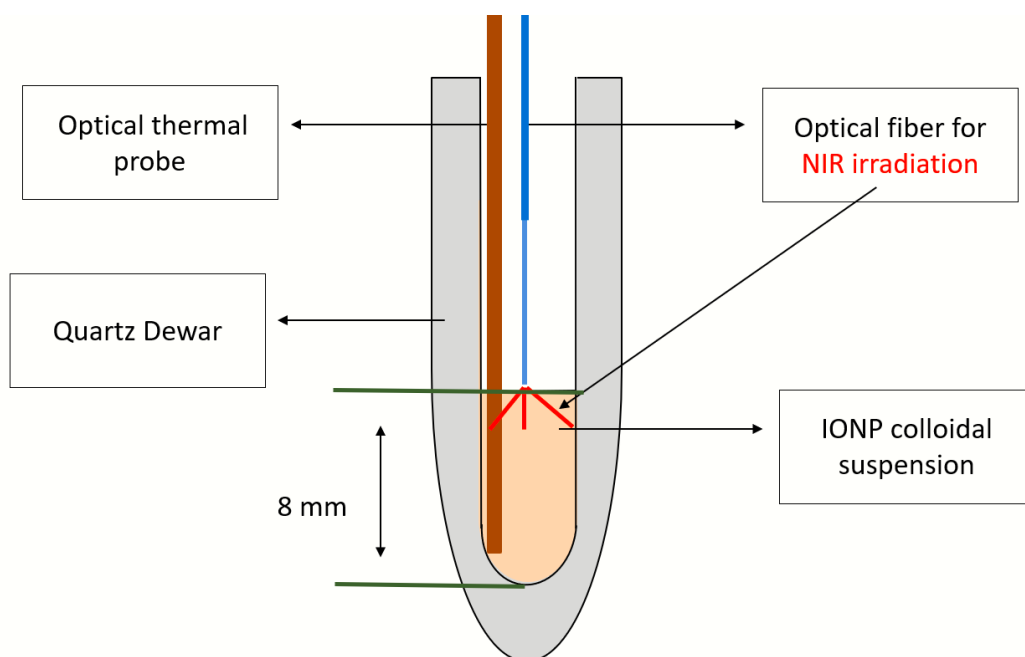

**Fig.S5.-** Schematic representation of the experimental set up for optical SLP measurements.

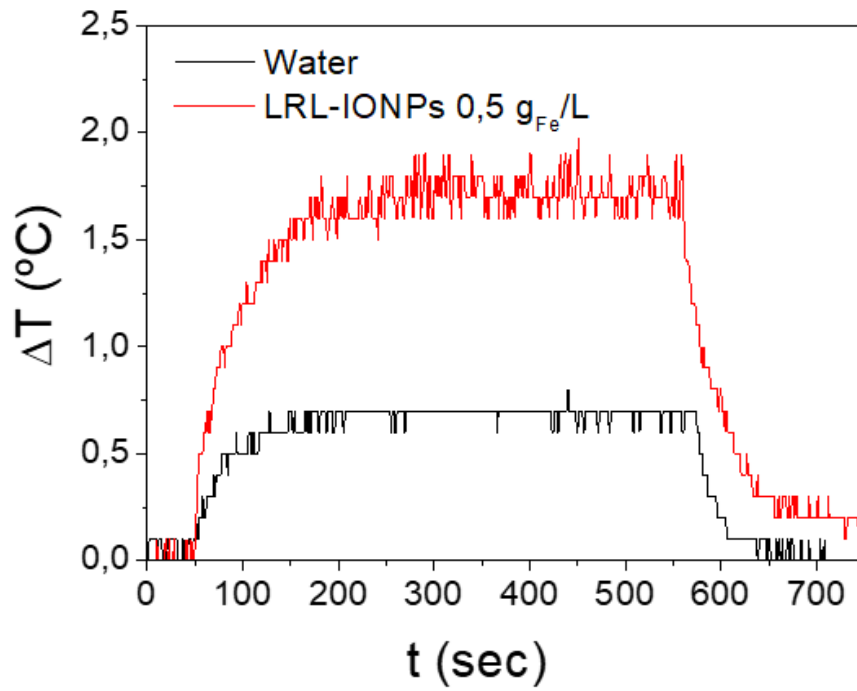

**Fig.S6.-** Temperature increments of LRL suspensions with  $[\text{Fe}]=0$  g/L (water) and  $0.5$  g<sub>Fe</sub>/L under NIR (808 nm and  $0.3$  W/cm<sup>2</sup>).



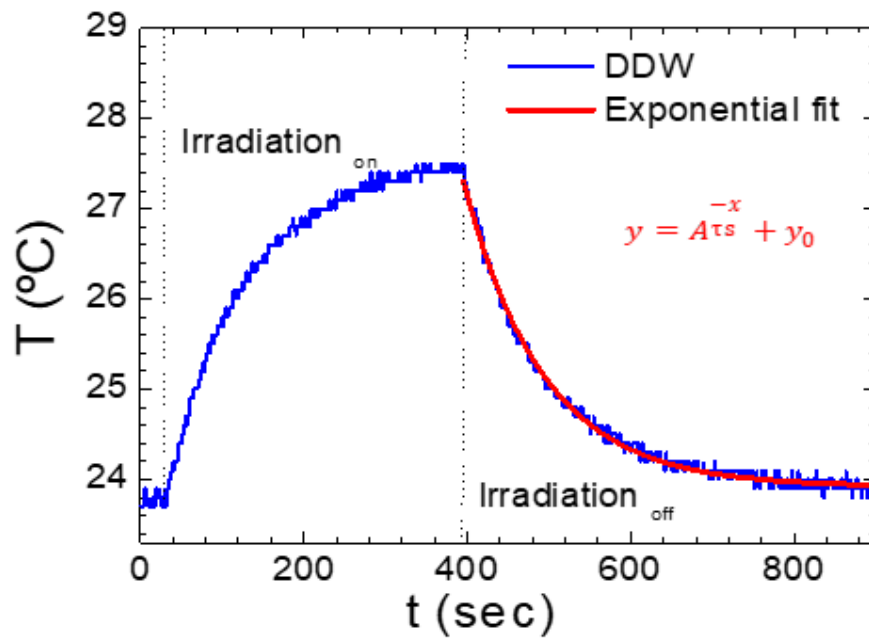

**Fig.S7.-** Temperature dynamic evolution of the IONP suspension (blue line) and fitting (red line) according to equation Eq.5 (see Experimental section). NIR conditions : 808 nm and 0.3 W/cm<sup>2</sup>. C-IONPs dispersed in DDW at [Fe]=1g/L.

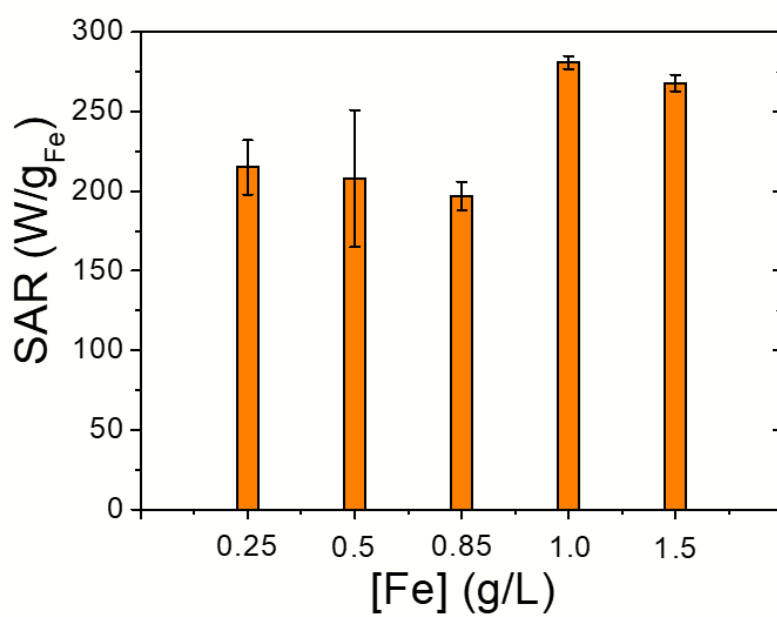

**Fig.S8.-** Magnetic SAR values of S-IONPs at different Fe concentrations. HAC conditions: 100 kHz, 32 kA/m.

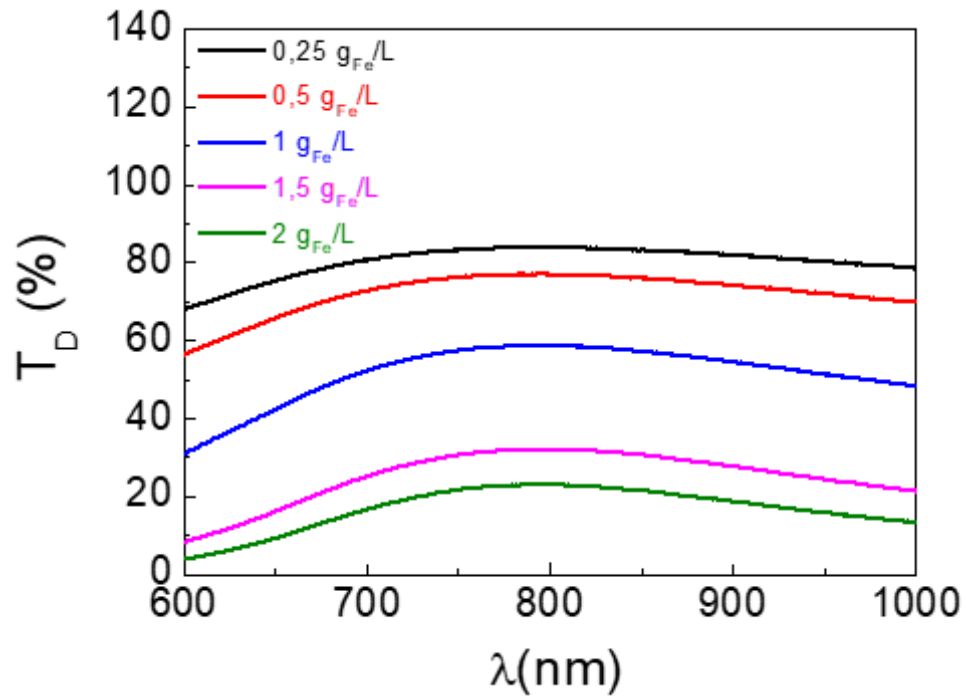

**Fig.S9.-** Optical direct transmission ( $T_D$ ) spectra of S-IONPs dispersed in DDW at different iron concentrations.

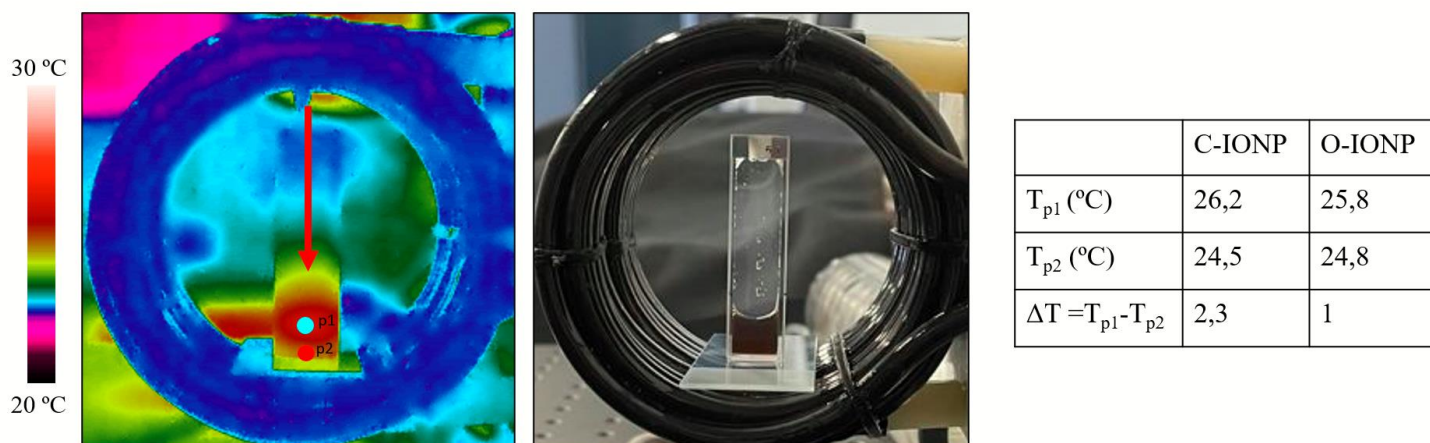

**Fig.S10.-** Thermal and visible images showing temperature map along NIR direction (red arrow). Table lists the temperature values at p1 (cyan spot) and p2 (red spot) positions for C-IONP and O-IONP suspensions at  $[Fe]=1g/L$ . NIR conditions: 808 nm and  $0.3 W/m^2$ .

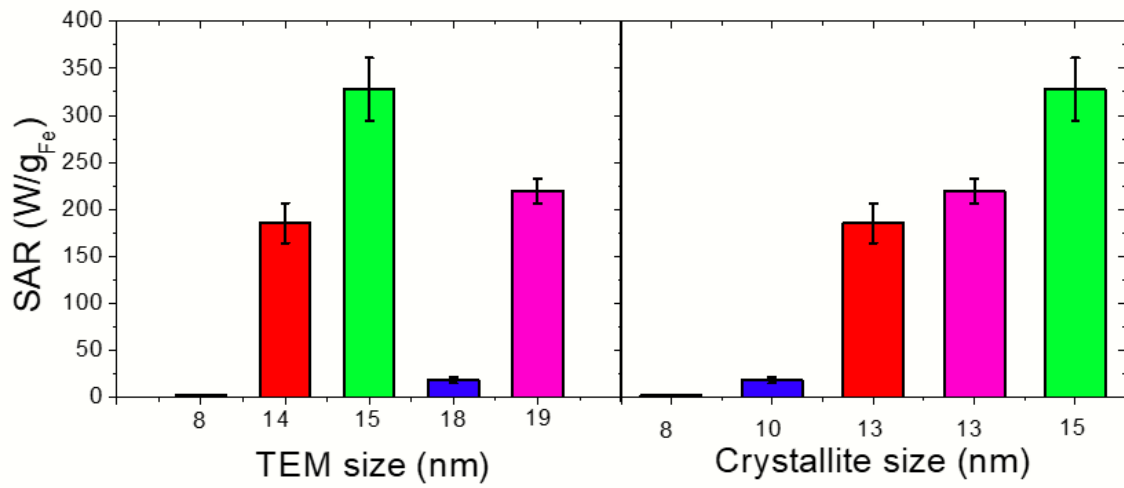

**Fig.S11.-** Magnetic SLP values of IONPs for different (a) TEM size and (b) crystal size. H<sub>AC</sub> conditions: 100 kHz, 32 kA/m; Irradiation conditions: 808 nm, and 0.3 W/cm<sup>2</sup>. IONPs were dispersed in DDW at [Fe]= 1 g/L.

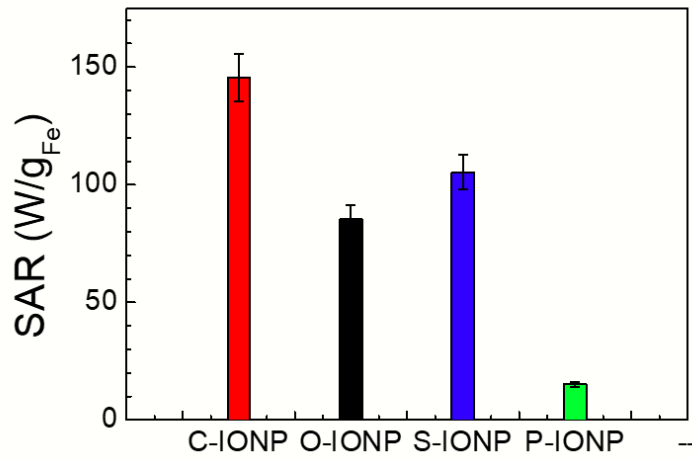

**Fig.S12.-** Magnetic SLP values of IONPs with different shape.  $H_{AC}$  conditions: 100 kHz, 32 kA/m; Irradiation conditions: 808 nm, 0,3 W/cm<sup>2</sup>. IONPs were dispersed in DDW at [Fe]= 1 g/L.

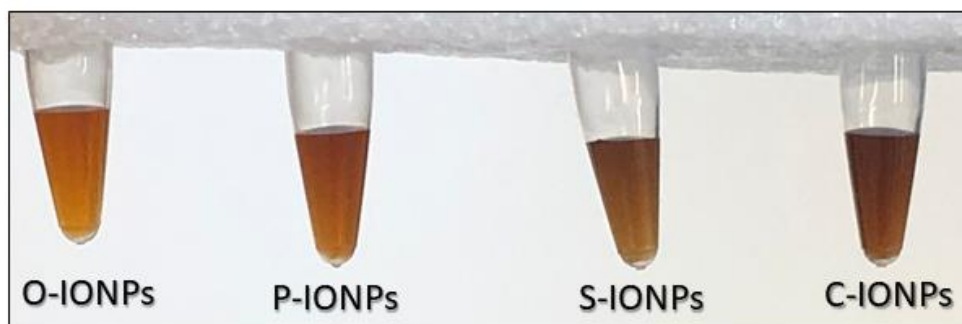

**Fig.S13.-** Picture of IONP colloids of different shapes at iron content  $[\text{Fe}] = 0.8 \text{ g}_{\text{Fe}}/\text{L}$ . Note the differences in colour of suspensions, getting darker in samples to the right.

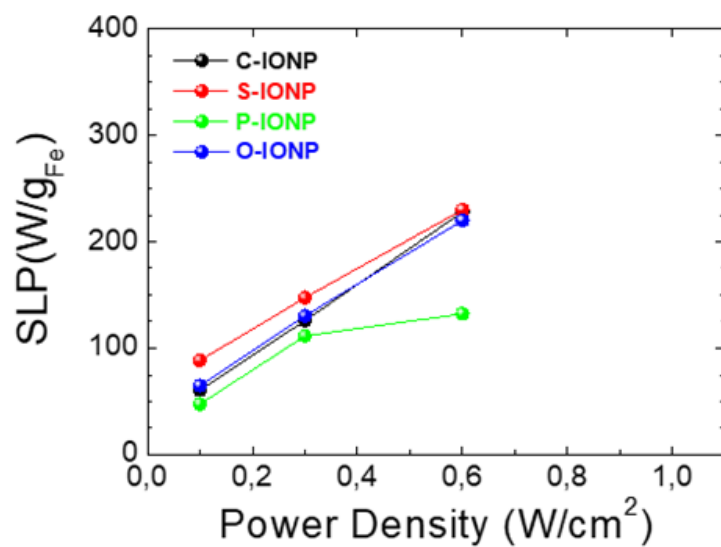

**Fig.S14.-** Optical SLP values as a function of irradiation power densities (from 0 to 0.6 W/cm<sup>2</sup>,  $\lambda_{exc} = 808$  nm) for IONPs of different shapes. The studied IONPs were dispersed in DDW at [Fe]= 1 g/L.



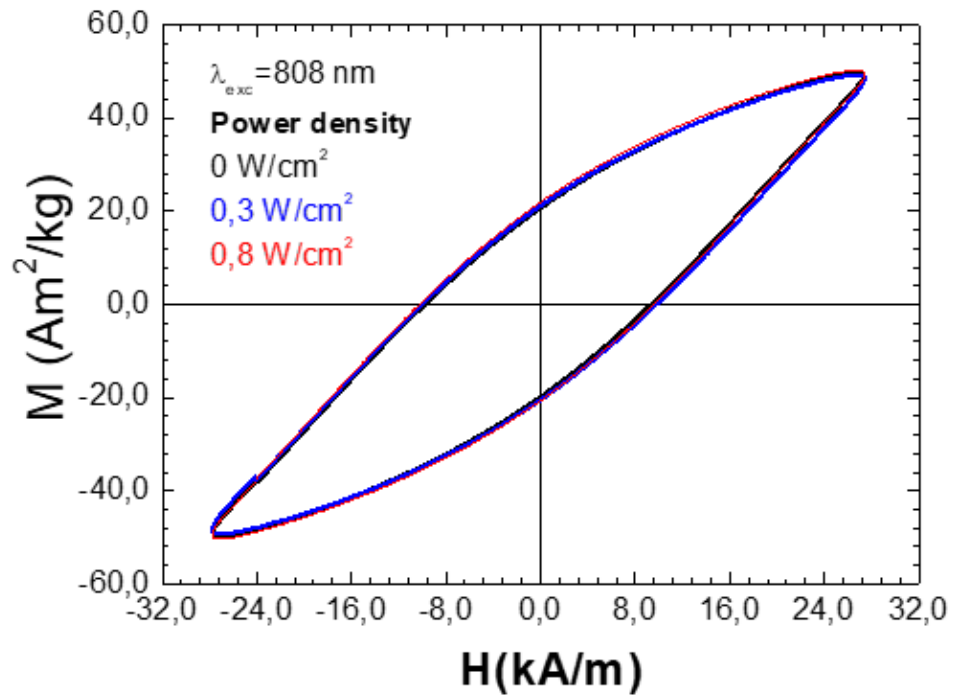

**Fig. S15.**-AC Hysteresis loops of 19-IONP under  $H_{\text{AC}}$  (100 kHz and 26 kA/m ) subjected to different irradiation power densities at  $\lambda_{\text{exc}} = 808 \text{ nm}$ : 0 (black colour), 0.3 (blue colour) and 0.8 (red colour)  $\text{W/cm}^2$ . The studied IONPs were dispersed in DDW at  $[\text{Fe}] = 1 \text{ g/L}$ .

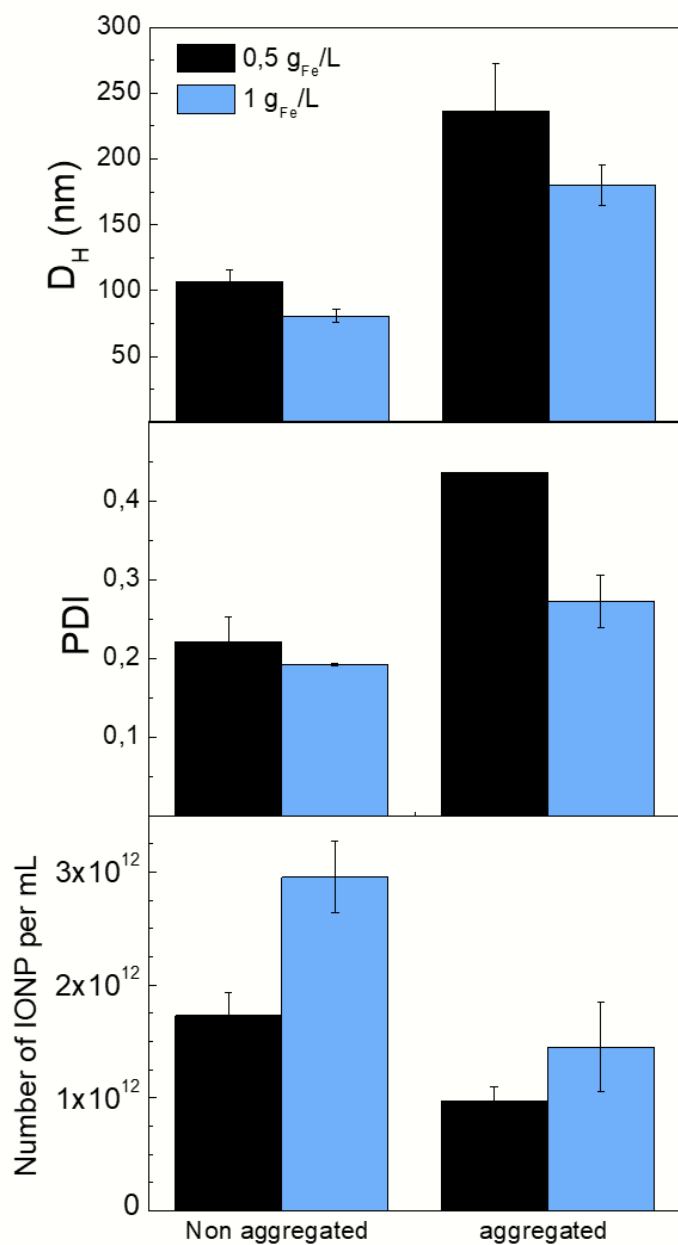

**Fig.S16.-** (a) Hydrodynamic size (b) PDI values (c) number of LRL nanoparticles per mL under different aggregation conditions at two iron contents: 0.5 g<sub>Fe</sub>/L (black columns) and 1 g<sub>Fe</sub>/L (cyan columns).

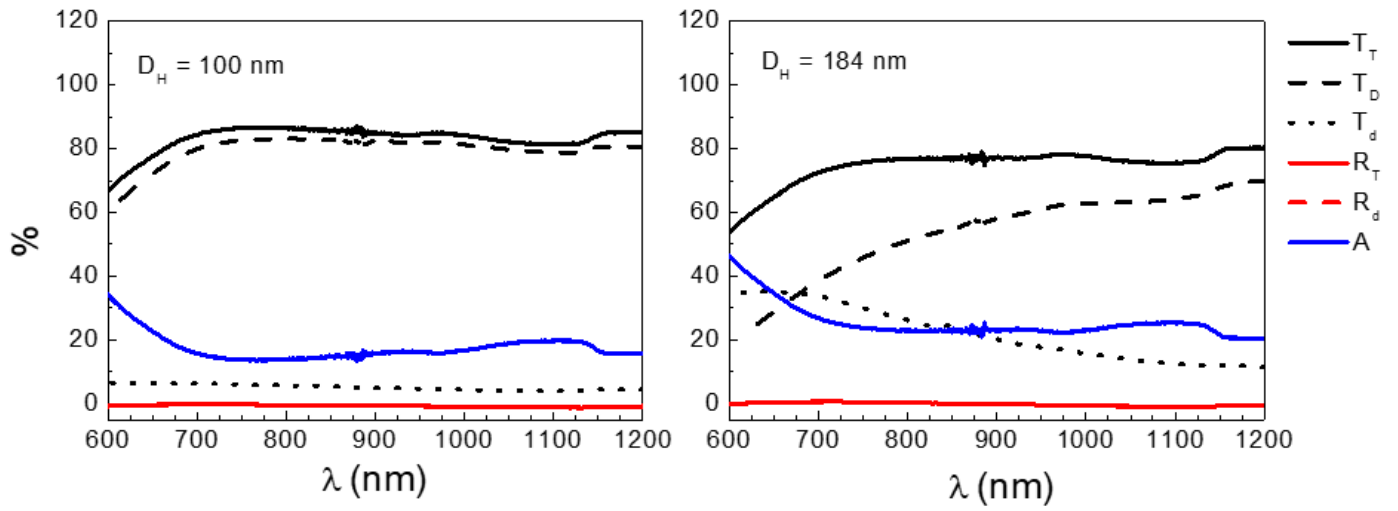

**Fig.S17.-** Total ( $T_T$ ), diffuse ( $T_d$ ) and direct ( $T_D$ ) transmission, total ( $R_T$ ) and diffuse ( $R_d$ ) reflectance, and absorbance ( $A$ ) of LRL with different  $D_H$  at  $0.5g_{Fe}/L$ .

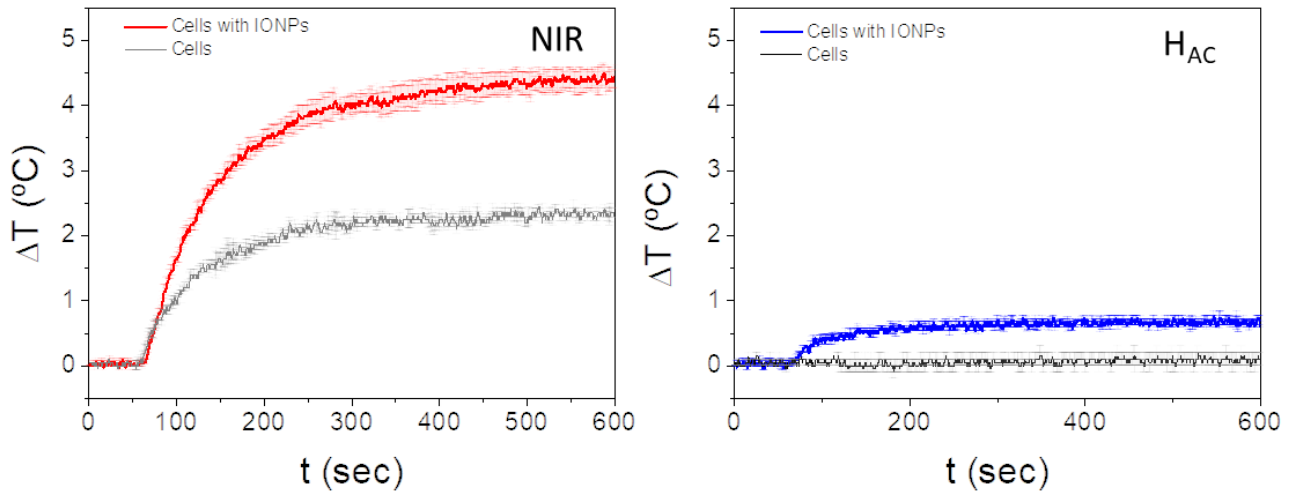

**Fig.S18.-** Temperature increments of MCF7 cell pellet (cells) and IONPs inside MCF7 cell pellet (cell with IONPs) under NIR (808 nm and  $0.3 \text{ W/m}_2$ ) or  $H_{AC}$  (100 kHz and 32 kA/m) conditions. The  $\Delta T$  values were obtained from three repetitions performed in three independent cell pellets. The iron content in the cell suspensions with IONPs was  $[\text{Fe}] = 2 \text{ g/L}$ .

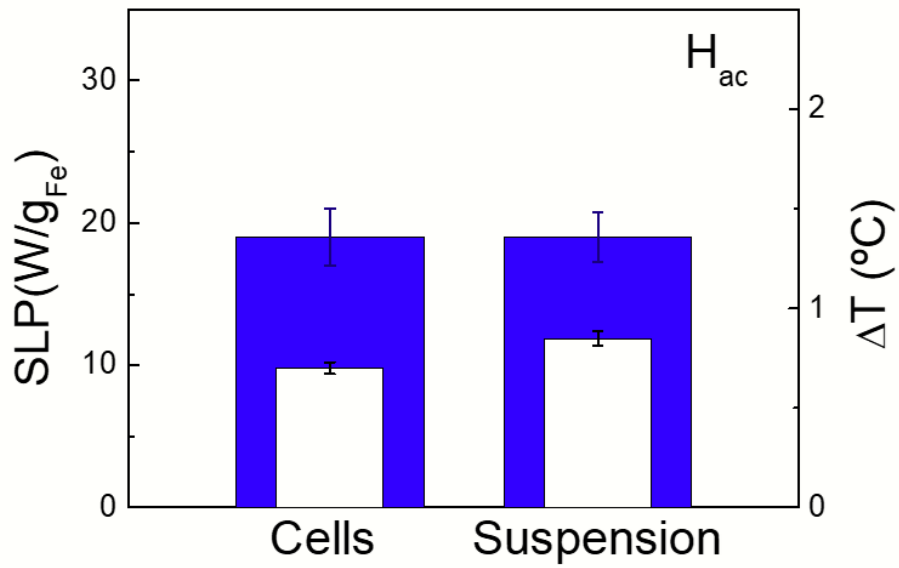

**Fig.S19.-** Magnetic SLP values (colour columns) and temperature increments (white columns) of FM-CT IONP inside MCF7 breast cancer cells and dispersed in DDW suspension at [Fe]= 2 g/L under  $H_{AC}$ . Intracellular SLP and  $\Delta T$  values were obtained from three repetitions performed in three independent cell pellets.  $H_{AC}$  conditions: 100 kHz, 32 kA/m.
